# Supplementary material
Source: HighWire-hosted journal article supplement (https://cmajopen.ca/highwire/filestream/80990/field_highwire_adjunct_files/1/open-2016-0056-2-at.pdf)
Supplement: open-2016-0056-2-at.pdf [file open-2016-0056-2-at.pdf]

## Appendix 2 (as supplied by the authors): Supplemental figures

*Supplemental Figure 1A: Age profile of the population of community-dwelling, long-term sedative users, women aged 18 and older, British Columbia, 2013*

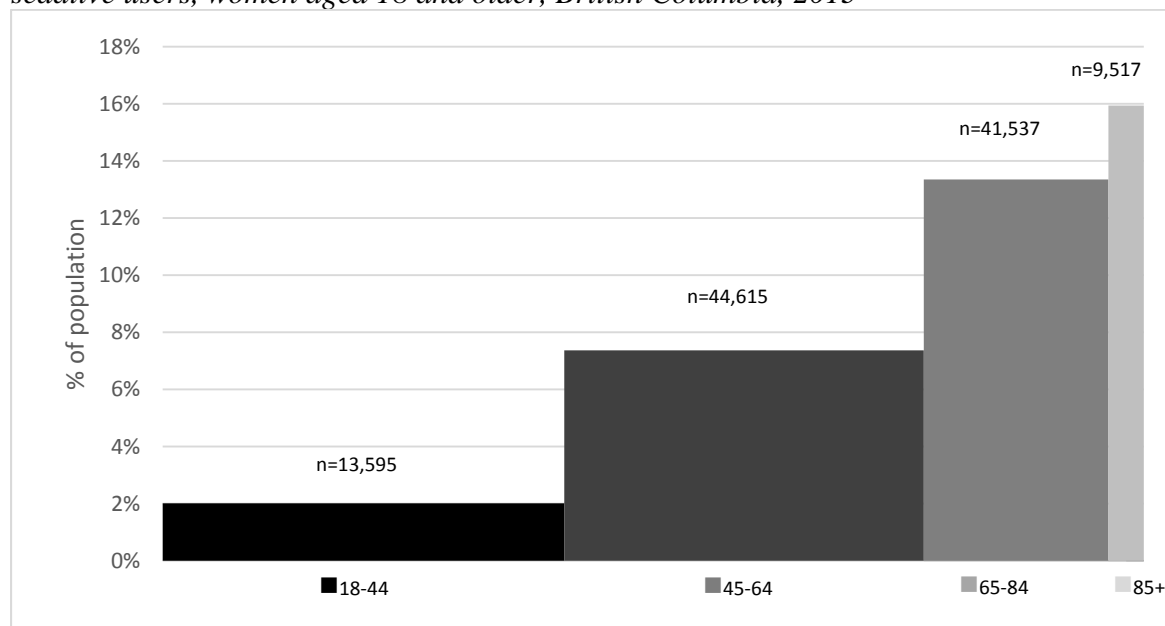

*Supplemental Figure 1B: Age profile of the population of community-dwelling, long-term sedative users, men aged 18 and older, British Columbia, 2013*

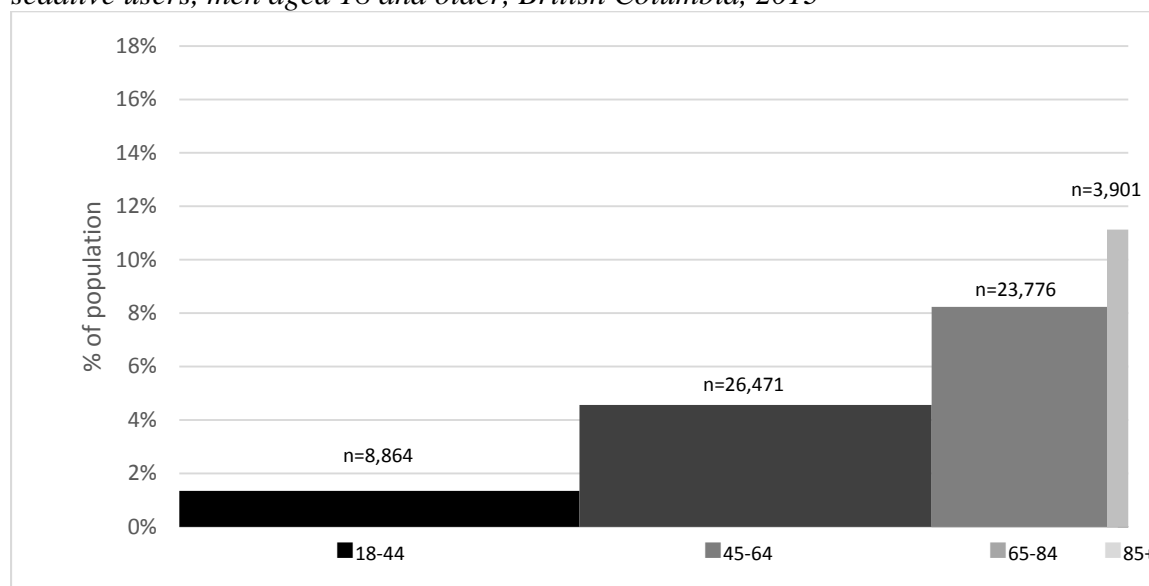

Note: Long-term sedative use defined by the filling of prescriptions containing a total of 90 or more days' supply of sedative during the calendar year. Bar width scaled by population size and n is equal to the number of long-term sedative users in each age group

Appendix to: Weymann D, Gladstone EM, Smolina K et al. Long-term sedative use among community-dwelling adults: a population-based analysis. *CMAJ Open* 2017.

DOI:10.9778/cmajo.20160056.

Copyright © 2017 The Author(s) or their employer(s).

To receive this resource in an accessible format, please contact us at [cmajgroup@cmaj.ca](mailto:cmajgroup@cmaj.ca).
